# Supplementary material
Source: publisher figshare collection journal article supplement (https://acs.figshare.com/ndownloader/files/21724356)
Supplement: Supplementary file 1 [file 21724356]

# Supporting Information for “Improved Prediction of Phase Behaviors of Ionic Liquid Solutions with Consideration of Directional Hydrogen Bonding Interactions”

Chun-Kai Chang and Shiang-Tai Lin\*

Department of Chemical Engineering, National Taiwan University, Taipei 10617, Taiwan

## S1. Cations and Anions of IL Examined in This Work

In this section, we provide the cations and anions of ILs examined in this work. In general, most of cations are imidazolium-based ion (e.g.  $[C_xMIM]$ ,  $x = 1, 2, 3...$ ) and most of anions have HB acceptor atoms connected to the third row atoms in the period table (e.g. S and P) such as  $[MeSO_4]$  and  $[DC_1Ph]$  or F-contained molecules. It is worth to mention that the lone pairs of these anions cannot be determined from the previous VSEPR method.<sup>1</sup> The cations and anions of IL examined in this work are listed in Table S1. For compounds that demonstrated in the main text, the corresponding hbc, COSMO surface, HB surface determined by COSMO-SAC 2018, and HB-level  $\sigma$ -profile are provided in Table S2. For those compounds that have multiple local minima

**Table S1. Summary of cations and anions of ionic liquids considered in this work**

| Cation /Anion | Formula        | Name                        | Chemical Structure                                                                    |
|---------------|----------------|-----------------------------|---------------------------------------------------------------------------------------|
| $[C_1MIM]$    | $C_5H_9N_2$    | 1,3-dimethylimidazolium     | 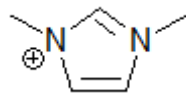 |
| $[C_2MIM]$    | $C_6H_{11}N_2$ | 1-ethyl-3-methylimidazolium |  |

|                       |                                                 |                                        |                                                                                       |
|-----------------------|-------------------------------------------------|----------------------------------------|---------------------------------------------------------------------------------------|
| [C <sub>3</sub> MIM]  | C <sub>7</sub> H <sub>13</sub> N <sub>2</sub>   | 1-propyl-3-methylimidazolium           | 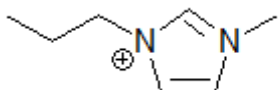   |
| [C <sub>4</sub> MIM]  | C <sub>8</sub> H <sub>15</sub> N <sub>2</sub>   | 1-butyl-3-methylimidazolium            |    |
| [C <sub>5</sub> MIM]  | C <sub>9</sub> H <sub>17</sub> N <sub>2</sub>   | 1-pentyl-3-methylimidazolium           |    |
| [C <sub>6</sub> MIM]  | C <sub>10</sub> H <sub>19</sub> N <sub>2</sub>  | 1-hexyl-3-methylimidazolium            |    |
| [C <sub>8</sub> MIM]  | C <sub>12</sub> H <sub>23</sub> N <sub>2</sub>  | 1-octyl-3-methylimidazolium            |   |
| [C <sub>16</sub> MIM] | C <sub>20</sub> H <sub>39</sub> N <sub>2</sub>  | 1-hexadecyl-3-methylimidazolium        |  |
| [C <sub>2</sub> DMIM] | C <sub>7</sub> H <sub>13</sub> N <sub>2</sub>   | 1-ethyl-2,3-dimethylimidazolium        |  |
| [C <sub>3</sub> DMIM] | C <sub>8</sub> H <sub>15</sub> N <sub>2</sub>   | 1,2-dimethyl-3-propylimidazolium       |  |
| [EOHMIM]              | C <sub>6</sub> H <sub>11</sub> N <sub>2</sub> O | 1-(2-hydroxyethyl)-3-methylimidazolium |  |
| [C <sub>1</sub> Mpy]  | C <sub>7</sub> H <sub>10</sub> N                | 1,3-dimethylpyridinium                 |  |

|                                    |                                                              |                                 |                                                                                       |
|------------------------------------|--------------------------------------------------------------|---------------------------------|---------------------------------------------------------------------------------------|
| [C <sub>2</sub> Mpy]               | C <sub>8</sub> H <sub>12</sub> N                             | 1-ethyl-3-methylpyridinium      | 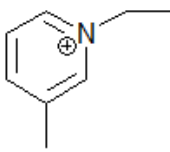   |
| [C <sub>4</sub> Mpy]               | C <sub>10</sub> H <sub>16</sub> N                            | 1-butyl-3-methylpyridinium      |    |
| [C <sub>4</sub> Mpyrr]             | C <sub>9</sub> H <sub>20</sub> N                             | 1-butyl-1-methylpyrrolidinium   |    |
| [py]                               | C <sub>5</sub> H <sub>6</sub> N                              | Pyridinium                      |   |
| [C <sub>2</sub> py]                | C <sub>7</sub> H <sub>10</sub> N                             | 1-ethylpyridinium               |  |
| [C <sub>4</sub> TMA]               | C <sub>7</sub> H <sub>18</sub> N                             | N-butyl-N,N,N-trimethylammonium |  |
| [C <sub>6</sub> TMA]               | C <sub>9</sub> H <sub>22</sub> N                             | N,N,N-trimethyl-1-hexanaminium  |  |
| [C <sub>4</sub> C <sub>1</sub> py] | C <sub>10</sub> H <sub>16</sub> N                            | N-butyl-4-methylpyridinium      |  |
| [TF <sub>2</sub> N]                | C <sub>2</sub> F <sub>6</sub> NO <sub>4</sub> S <sub>2</sub> | bis-(trifluoromethylsulfonyl)   |  |

|                      |                                                |                          |                                                                                       |
|----------------------|------------------------------------------------|--------------------------|---------------------------------------------------------------------------------------|
|                      |                                                | imide                    |                                                                                       |
| [PF <sub>6</sub> ]   | F <sub>6</sub> P                               | hexafluorophosphate      | 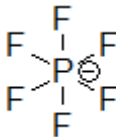   |
| [BF <sub>4</sub> ]   | BF <sub>4</sub>                                | tetrafluoroborate        |    |
| [OTF]                | CF <sub>3</sub> O <sub>3</sub> S               | trifluoromethylsulfonate |    |
| [Ac]                 | C <sub>2</sub> H <sub>3</sub> O <sub>2</sub>   | Acetate                  |   |
| [Br]                 | Br                                             | Bromide                  | Br <sup>-</sup>                                                                       |
| [I]                  | I                                              | Iodide                   | I <sup>-</sup>                                                                        |
| [Cl]                 | Cl                                             | Chloride                 | Cl <sup>-</sup>                                                                       |
| [CNS]                | CNS                                            | thiocyanate              | <sup>⊖</sup> S—C≡N                                                                    |
| [DC <sub>1</sub> Ph] | C <sub>2</sub> H <sub>6</sub> O <sub>4</sub> P | dimethylphosphate        |  |
| [DCN]                | C <sub>2</sub> N <sub>3</sub>                  | dicyanamide              |  |
| [MeSO <sub>4</sub> ] | CH <sub>3</sub> O <sub>4</sub> S               | methylsulfate            |  |

|                                   |                                                 |                     |                                                                                     |
|-----------------------------------|-------------------------------------------------|---------------------|-------------------------------------------------------------------------------------|
| [EtSO <sub>4</sub> ]              | C <sub>2</sub> H <sub>5</sub> O <sub>4</sub> S  | ethylsulfate        | 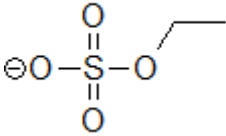 |
| [C <sub>8</sub> SO <sub>4</sub> ] | C <sub>8</sub> H <sub>17</sub> O <sub>4</sub> S | octylsulfate        |  |
| [MOEtSO <sub>4</sub> ]            | C <sub>3</sub> H <sub>7</sub> O <sub>5</sub> S  | methoxyethylsulfate |  |

**Table S2. Some examples of hbc, HB surfaces, and  $\sigma$ -profiles in HB-level of the molecules discussed in this work.**

| Name       | Full Name  | Geometry & hbc                                                                      | COSMO surface<br>-0.0025 0.0025 (e/Å <sup>2</sup> )<br> | Directional HB<br>surface<br>■ donor ■ acceptor                                       | HB-level $\sigma$ -profile<br>— 2010 (OH) — 2010 (OT) — 2018                          |
|------------|------------|-------------------------------------------------------------------------------------|-------------------------------------------------------------------------------------------------------------------------------------------|---------------------------------------------------------------------------------------|---------------------------------------------------------------------------------------|
| Methanol   | Methanol   |    |                                                         |    |    |
| 1-Propanol | 1-Propanol |    |                                                         |    |   |
| 1-Butanol  | 1-Butanol  |  |                                                       |  |  |

|                      |                               |                                                                                     |                                                                                      |                                                                                       |                                                                                       |
|----------------------|-------------------------------|-------------------------------------------------------------------------------------|--------------------------------------------------------------------------------------|---------------------------------------------------------------------------------------|---------------------------------------------------------------------------------------|
| Water                | Water                         |    |    |    |    |
| [C <sub>2</sub> MIM] | 1-ethyl-3-methylimidazolium   |    |    |    |    |
| [C <sub>4</sub> MIM] | 1-n-butyl-3-methylimidazolium |    |   |   |   |
| [C <sub>6</sub> MIM] | 1-hexyl-3-methylimidazolium   |  |  |  |  |

|                      |                                            |                                                                                     |                                                                                      |                                                                                       |                                                                                       |
|----------------------|--------------------------------------------|-------------------------------------------------------------------------------------|--------------------------------------------------------------------------------------|---------------------------------------------------------------------------------------|---------------------------------------------------------------------------------------|
| [EOHMIM]             | 1-(2-hydroxyethyl)-<br>3-methylimidazolium | 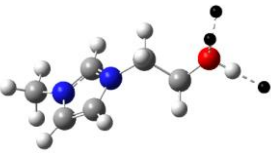   |    |    |    |
| [C <sub>1</sub> MPy] | 1,3-<br>dimethylpyridinium                 |    |    |    |    |
| [BF <sub>4</sub> ]   | Tetrafluoroborate                          |   |   |   |   |
| [Cl]                 | Chloride                                   |  |  |  |  |



|                        |                                   |                                                                                     |                                                                                      |                                                                                       |                                                                                       |
|------------------------|-----------------------------------|-------------------------------------------------------------------------------------|--------------------------------------------------------------------------------------|---------------------------------------------------------------------------------------|---------------------------------------------------------------------------------------|
| [EtSO <sub>4</sub> ]   | Ethylsulfate                      |    |    |    |    |
| [EOEtSO <sub>4</sub> ] | Ethoxyethylsulfate                |    |    |    |    |
| [PF <sub>6</sub> ]     | Hexafluorophosphate               |    |    |    |    |
| [TF <sub>2</sub> N]    | Bis(trifluoromethylsulfonyl)imide |  |  |  |  |

|                      |                   |                                                                                   |                                                                                    |                                                                                     |                                                                                     |
|----------------------|-------------------|-----------------------------------------------------------------------------------|------------------------------------------------------------------------------------|-------------------------------------------------------------------------------------|-------------------------------------------------------------------------------------|
| [DC <sub>1</sub> Ph] | Dimethylphosphate | 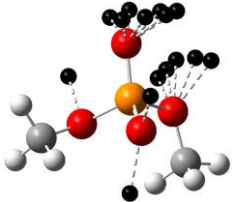 |  |  |  |
|----------------------|-------------------|-----------------------------------------------------------------------------------|------------------------------------------------------------------------------------|-------------------------------------------------------------------------------------|-------------------------------------------------------------------------------------|

## S2. Detail Results for IDAC, Osmotic Coefficient, LLE, and VLE

### Results of Demonstrated Examples

(a)

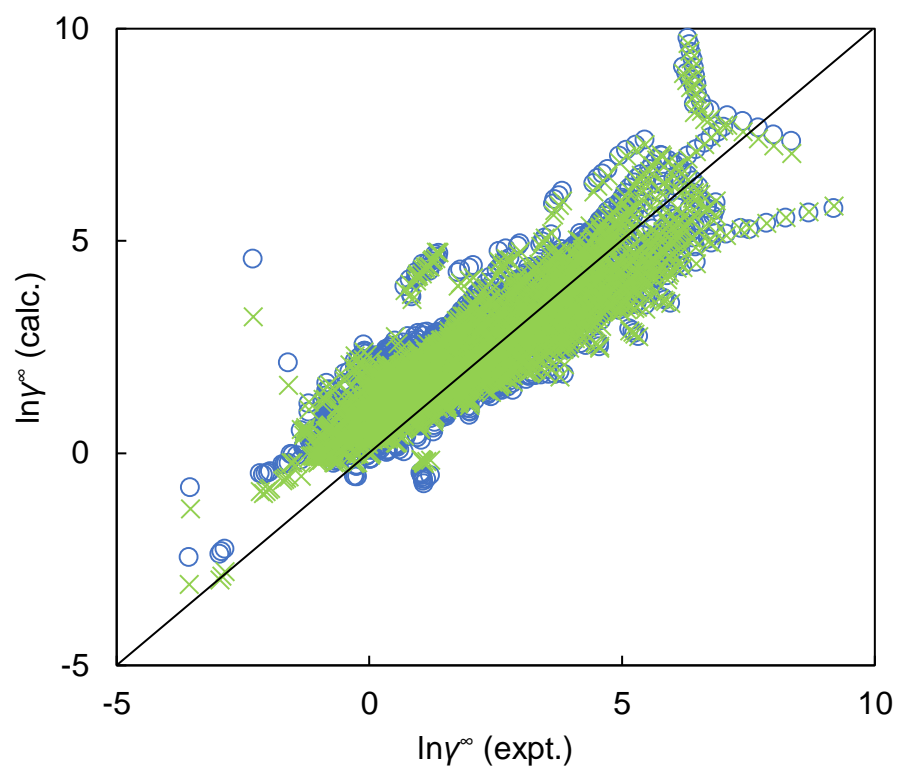

(b)

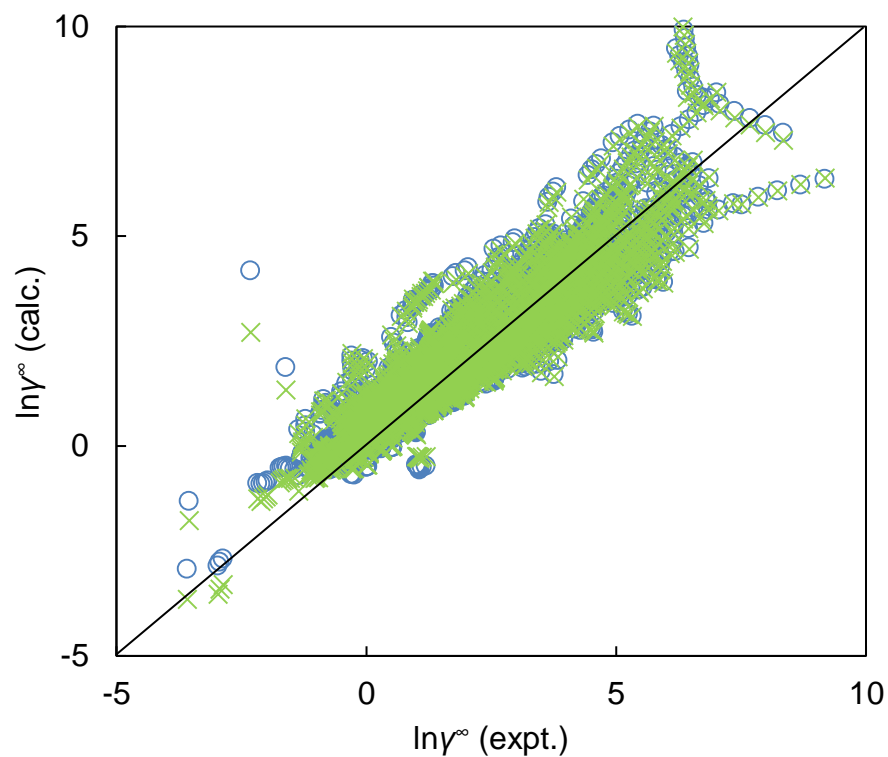

**Fig. S1 The IDAC of neutral species in ILs predicted by COSMO-SAC models with (a)  $\alpha = 1$  (b)  $\alpha_0 = 0.35$ . (COSMO-SAC 2010: blue circles  $\circ$  ; COSMO-SAC 2018: green crosses  $\times$  )**

(a)

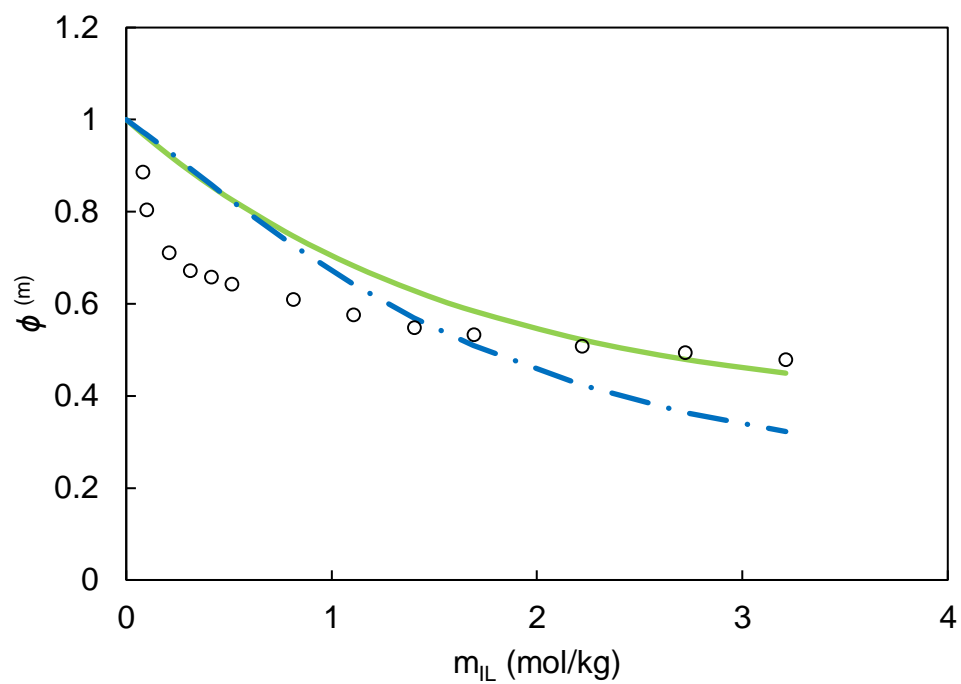

(b)

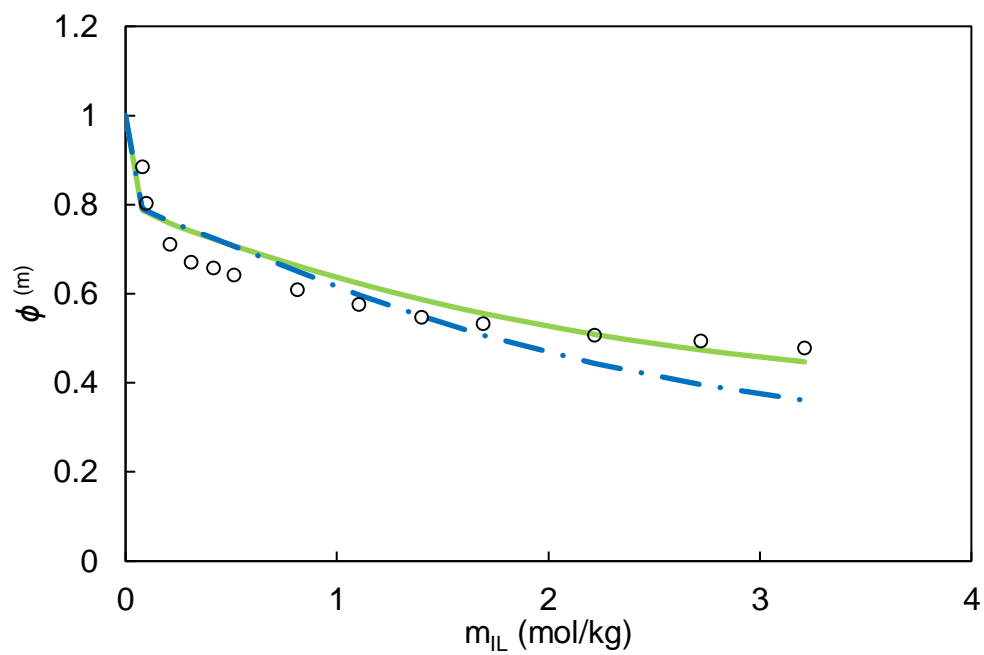

(c)

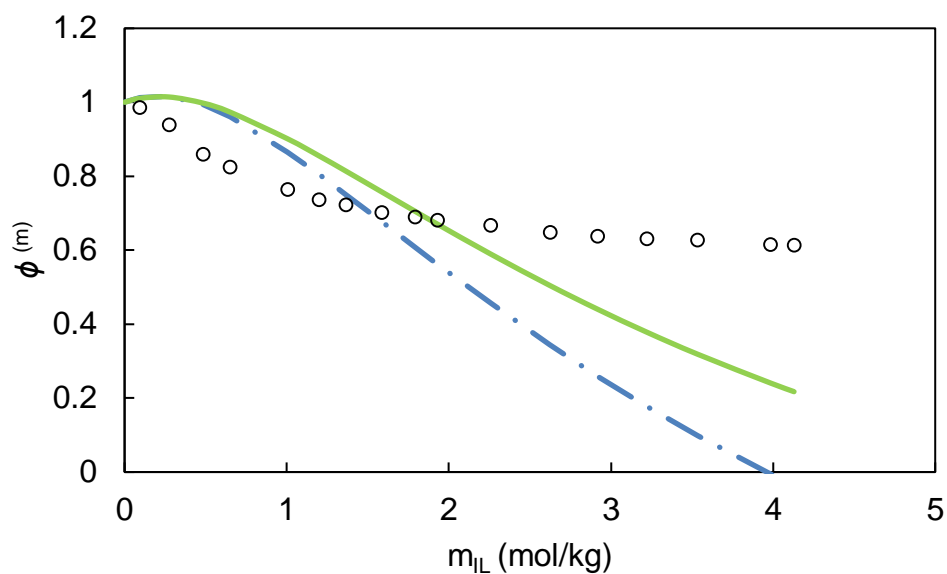

(d)

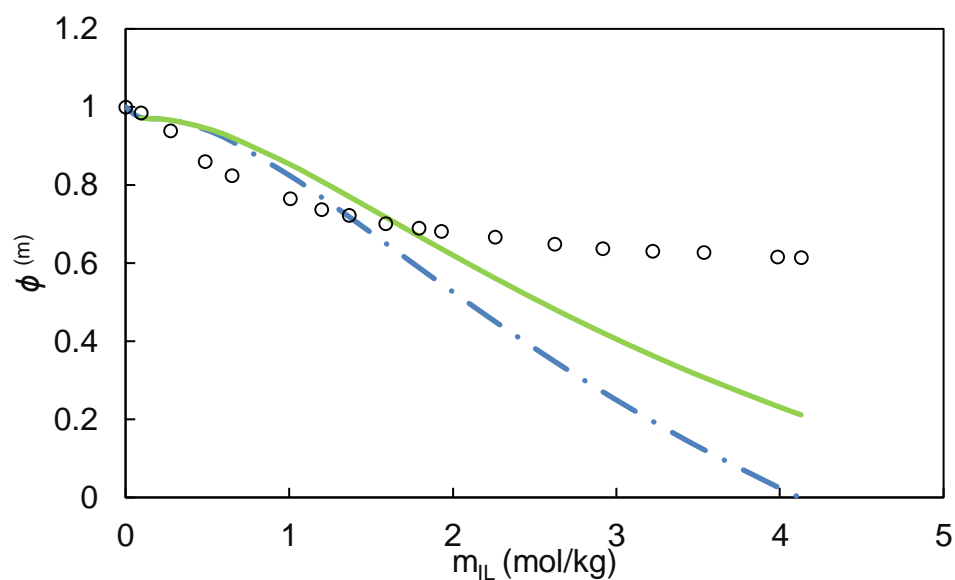

**Fig. S2 The osmotic coefficient of 1-propanol-[C<sub>1</sub>MPy][MeSO<sub>4</sub>] at 323.15 K<sup>2</sup>: (a)  $\alpha = 0$  (b)  $\alpha_0 = 0.35$  and water-[C<sub>6</sub>MIM][Cl] binary system at 313.15 K<sup>3</sup>: (c)  $\alpha = 0$  (d)  $\alpha_0 = 0.35$  predicted by COSMO-SAC models. (COSMO-SAC 2010: blue chain lines - . - ; COSMO-SAC 2018: green solid lines — ; experimental data: black circles ○ )**

(a)

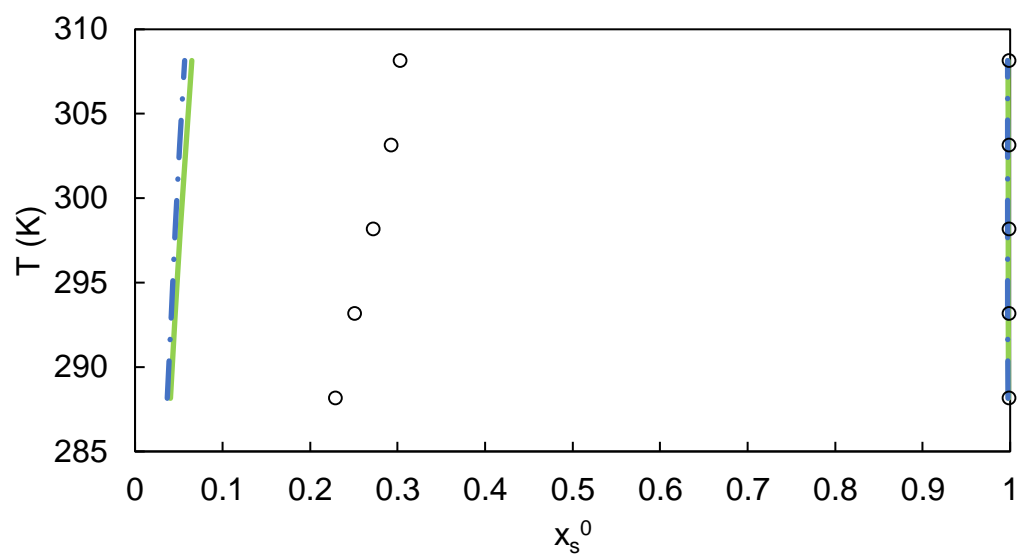

(b)

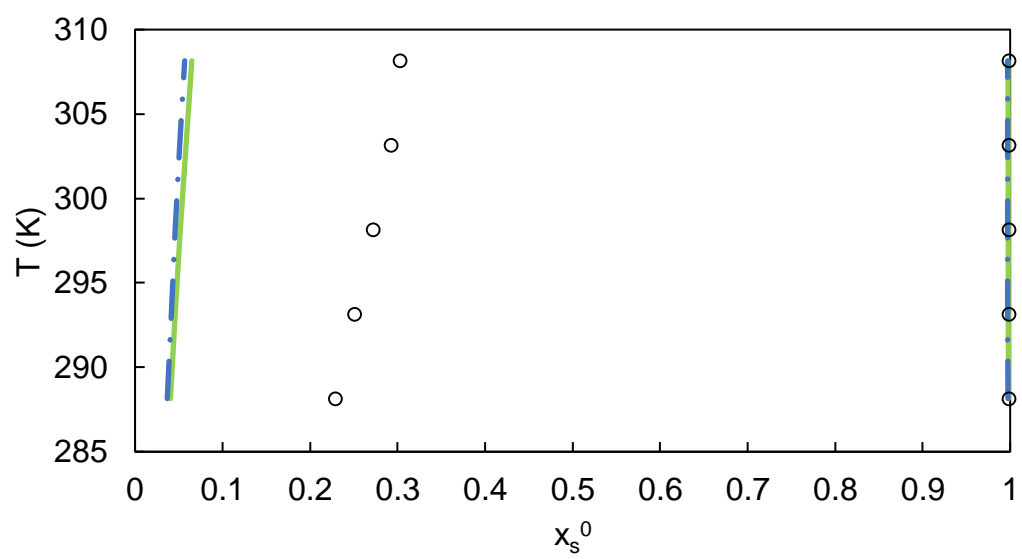

(c)

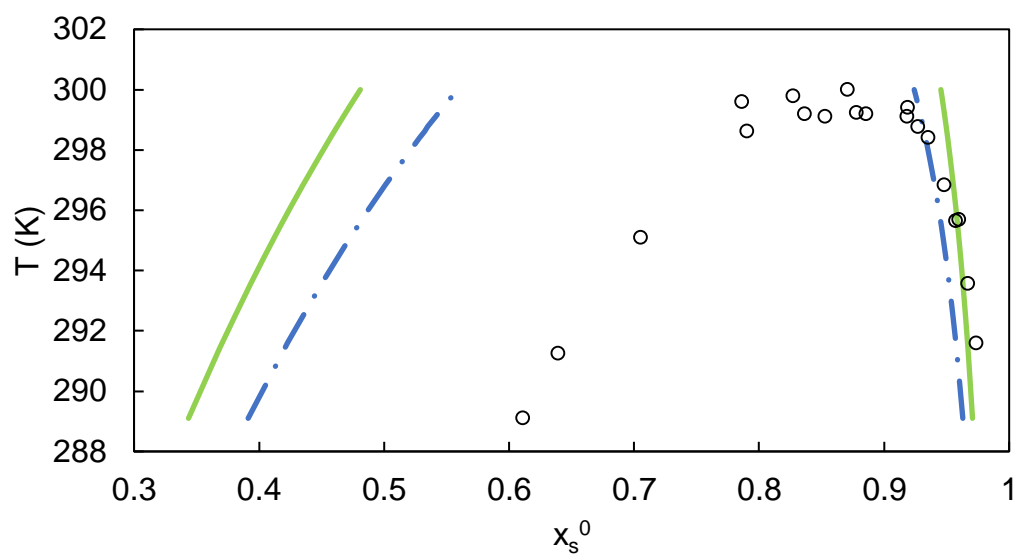

**Fig. S3 The LLE of water mixed with [C<sub>4</sub>MIM][PF<sub>6</sub>] system<sup>4</sup>: (a)  $\alpha = 1$  (b)  $\alpha_0 = 0.35$  and (c) butanol mixed with [C<sub>4</sub>MIM][TF<sub>2</sub>N]<sup>5</sup> with  $\alpha = 1$  from different COSMO-SAC models (COSMO-SAC 2010: blue chain lines  $-\cdot-$ ; COSMO-SAC 2018: green solid lines  $—$ ; experimental data: black circles  $\circ$ )**

(a)

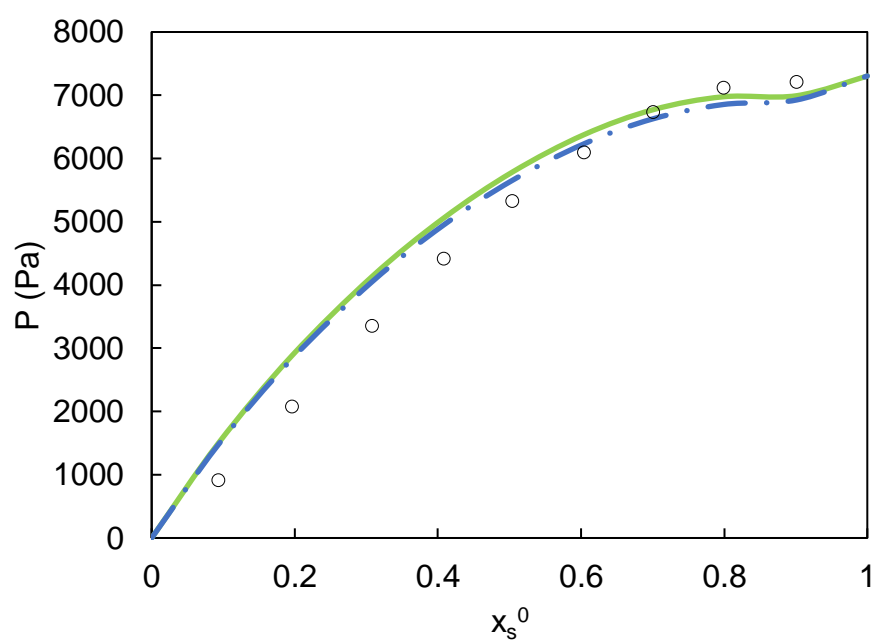



(b)

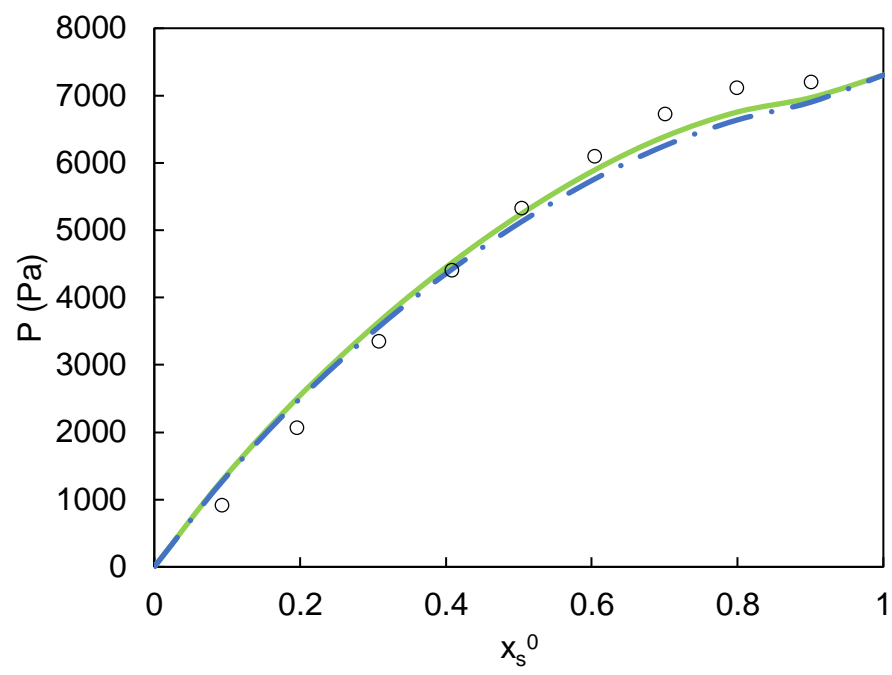

(c)

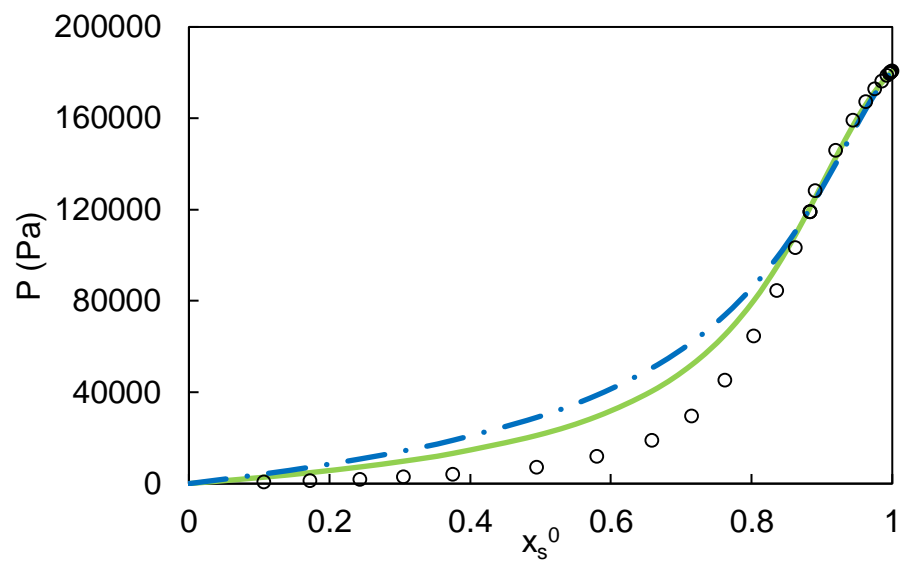

(d)

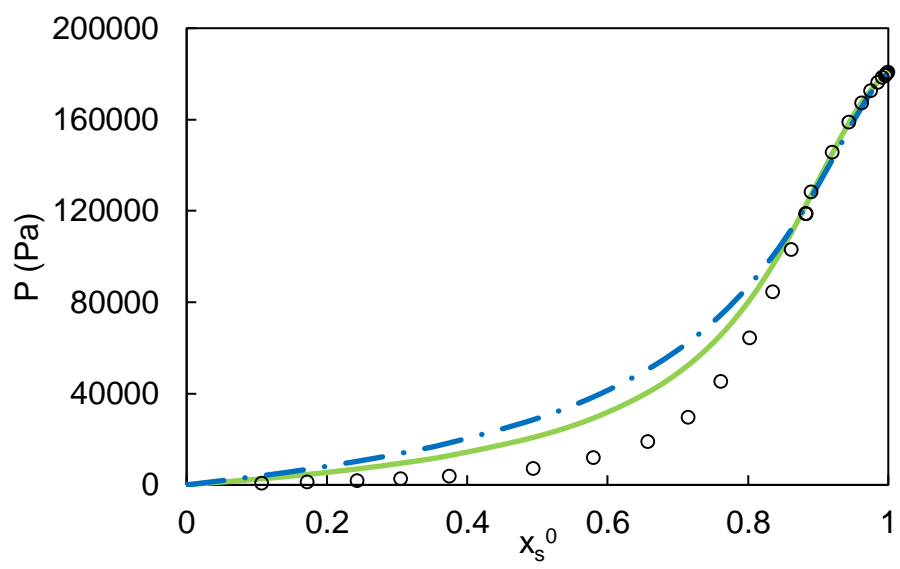

(e)

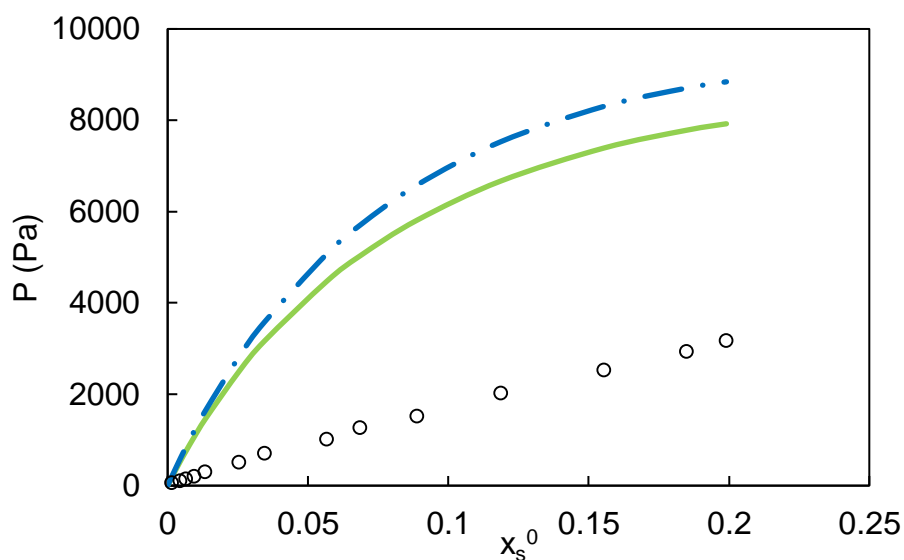

(f)

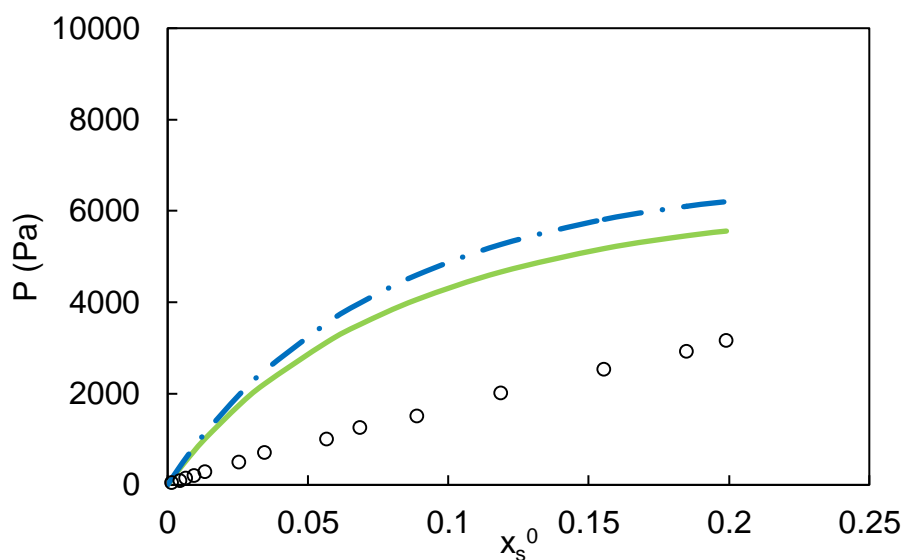

**Fig. S4** The vapor pressure of methanol in  $[\text{C}_4\text{MIM}][\text{BF}_4]$  at  $283.15\text{ K}^6$  with  $\alpha = 1$  (a) and  $\alpha_0 = 0.35$  (b); methanol in  $[\text{C}_1\text{MIM}][\text{DC}_1\text{Ph}]$  at  $353.15\text{ K}^7$  with  $\alpha = 1$  (c) and  $\alpha_0 = 0.35$  (d); water in  $[\text{C}_8\text{MIM}][\text{PF}_6]$  at  $298.15\text{ K}^8$  with  $\alpha = 1$  (e) and  $\alpha_0 = 0.35$  (f) from the COSMO-SAC models and experimental data. (COSMO-SAC 2010: blue chain lines  $-\cdot-$  ; COSMO-SAC 2018: green solid lines  $—$  ; experimental data: black circles  $\circ$  )

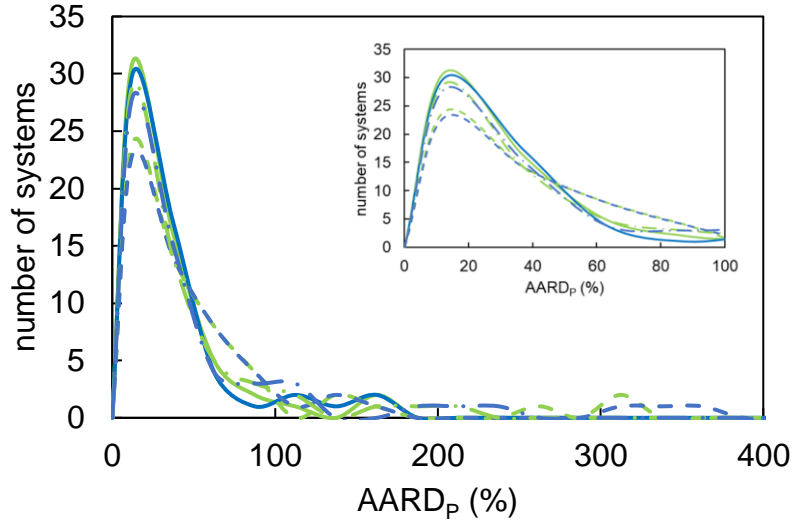

**Fig. S5 Comparison of the distribution of AARD<sub>P</sub> in the VLE calculated from COSMO-SAC 2010 (blue lines —) and COSMO-SAC 2018 (green lines —) with different treatment of IL dissociation ( $\alpha = 0$ : solid lines —;  $\alpha_0 = 0.35$ : chain lines — . —;  $\alpha = 1$ : dashed lines - - - )**

### **S3. Details for determination of dielectric constant and density of individual species**

For the PDH model, the density of a pure solvent is calculated from the molecular weight and its volume from COSMO calculations ( $V_i$ ),<sup>9</sup> that is

$$d_i = \frac{M_i}{V_i N_a} \quad (S1)$$

where  $N_a$  is the Avogadro number.

The dielectric constant of a pure solvent is obtained by same method in the reference<sup>10</sup> for water ( $\epsilon_{water}$ ) with the following equation

$$\epsilon_{water} = 3.84093 \times 10^{-4} \times (T - 298.15)^2 - 3.18404 \times 10^{-1} \times (T - 298.15) + 78.3055 \quad (S2)$$

For other neutral molecules, cubic equation  $\epsilon(T) = a + bT + cT^2 + dT^3$  is used with coefficients found in CRC handbook<sup>11</sup>. The empirical formula suggested by the reference is used for the ILs<sup>12</sup>, which is

$$\epsilon_{IL} = 832.09 \times (1000M_{IL})^{-0.701} \quad (S3)$$

Also note that for ionic liquid, both cation and anion are assumed to have same properties when using the extended PDH model (Eq. 2) That is,

$$\theta_{caion} = \theta_{anion} = \theta_{IL} \quad (S4)$$

where  $\theta$  can be  $M$ ,  $d$  or  $\epsilon$ .

#### **S4. Details for Determination of the Lone Pair Positions in the COSMO-SAC 2018**

To make it easier for readers to reproduce the lone-pair position in the COMSO-SAC 2018 in ADF, we provide the calculation procedures and results of water molecule as an example. Once the readers who are interested in the determination of lone-pair positions or hbc can reproduce the results of water, they should also get right positions for the others. The first three rows are the input geometry of a water molecule. The local minima, which are the lone pair positions, are shown as  $E_1$  and  $E_2$ . The direction of each lone pair is computed by subtracting  $E_i$  from O, the result is shown in the row  $\overrightarrow{OE_1}$ . Finally, the i-th  $\overrightarrow{hbc}$  of water is determined by

$$\overrightarrow{hbc_1} = \vec{O} + \frac{\overrightarrow{OE_1}}{|\overrightarrow{OE_1}|} \times R_{\text{COSMO}}(O) \quad (S5)$$

where  $R_{\text{COSMO}}(O)$  is the COSMO radius of O ( $= 1.72 \text{ \AA}$ ).

Table S4. Input geometry of water, the LP positions obtained from ADF “densf” utility, and hbc used in the COSMO-SAC 2018.

|               | x (Å)    | y (Å)    | z (Å)    |
|---------------|----------|----------|----------|
| $\vec{O}$     | 0.00000  | 0.00000  | 0.59372  |
| $\vec{H}$     | 0.00000  | 0.76544  | -0.00836 |
| $\vec{H}$     | 0.00000  | -0.76544 | -0.00836 |
| $\vec{E_1}$   | -0.95252 | 0.00000  | 1.40395  |
| $\vec{E_2}$   | 0.95252  | 0.00000  | 1.40395  |
| $\vec{OE_1}$  | -0.95252 | 0.00000  | 0.81023  |
| $\vec{OE_2}$  | 0.95252  | 0.00000  | 0.81023  |
| $\vec{hbc_1}$ | -1.31014 | 0.00000  | 1.70815  |
| $\vec{hbc_2}$ | 1.31014  | 0.00000  | 1.70815  |

## Reference

1. Chen, W.-L.; Lin, S.-T., Explicit consideration of spatial hydrogen bonding direction for activity coefficient prediction based on implicit solvation calculations. *Phys. Chem. Chem. Phys.* **2017**, 19, (31), 20367-20376.
2. Gómez, E.; Calvar, N.; Domínguez, Á.; Macedo, E. A., Measurement and modeling of osmotic coefficients of binary mixtures (alcohol+1,3-dimethylpyridinium methylsulfate) at T=323.15K. *J. Chem. Thermodyn.* **2011**, 43, (6), 908-913.
3. González, B.; Calvar, N.; Domínguez, Á.; Macedo, E. A., Osmotic coefficients of aqueous solutions of four ionic liquids at T=(313.15 and 333.15) K. *J. Chem. Thermodyn.* **2008**, 40, (9), 1346-1351.
4. Freire, M. G.; Neves, C. M. S. S.; Carvalho, P. J.; Gardas, R. L.; Fernandes, A. M.; Marrucho, I. M.; Santos, L. M. N. B. F.; Coutinho, J. A. P., Mutual Solubilities of Water and Hydrophobic Ionic Liquids. *J. Phys. Chem. B* **2007**, 111, (45), 13082-13089.
5. Domańska, U., Solubilities and thermophysical properties of ionic liquids. In *Pure Appl. Chem.*, 2005; Vol. 77, p 543.
6. Katayanagi, H.; Nishikawa, K.; Shimozaki, H.; Miki, K.; Westh, P.; Koga, Y., Mixing Schemes in Ionic Liquid–H<sub>2</sub>O Systems: A Thermodynamic Study. *J. Phys. Chem. B* **2004**, 108, (50), 19451-19457.
7. Kato, R.; Gmehling, J., Measurement and correlation of vapor–liquid equilibria of binary systems containing the ionic liquids [EMIM][(CF<sub>3</sub>SO<sub>2</sub>)<sub>2</sub>N], [BMIM][(CF<sub>3</sub>SO<sub>2</sub>)<sub>2</sub>N], [MMIM][(CH<sub>3</sub>)<sub>2</sub>PO<sub>4</sub>] and oxygenated organic compounds respectively water. *Fluid Phase Equilib.* **2005**, 231, (1), 38-43.
8. Anthony, J. L.; Maginn, E. J.; Brennecke, J. F., Solution Thermodynamics of Imidazolium-Based Ionic Liquids and Water. *J. Phys. Chem. B* **2001**, 105, (44), 10942-10949.
9. Lee, B.-S.; Lin, S.-T., The role of long-range interactions in the phase behavior of ionic liquids. *Phys. Chem. Chem. Phys.* **2012**, 14, (18), 6520-6525.
10. Hsieh, M.-T.; Lin, S.-T., A predictive model for the excess gibbs free energy of fully dissociated electrolyte solutions. *AIChE J.* **2011**, 57, (4), 1061-1074.
11. Wohlfarth, C., Permittivity (dielectric constant) of liquids. In *CRC-The handbook of chemistry and physics*, DR, L., Ed. CRC Press: Boca Raton, Florida, 2004; pp 6-166.
12. Lee, B.-S.; Lin, S.-T., Prediction of phase behaviors of ionic liquids over a wide range of conditions. *Fluid Phase Equilib.* **2013**, 356, 309-320.
